# Supplementary material for: Optical detection of sulfur mustard contaminated surfaces based on a sprayable fluorescent probe
Source: Royal Society of Chemistry journal article supplement (doi:10.1039/d1nj03921k), 2021-01-01
Supplement: d1nj03921k1.pdf [file d1nj03921k1.pdf]

Supporting Information for

## Optical detection of sulfur mustard contaminated surface based on sprayable fluorescence probe

Bin Ma,<sup>a</sup> Guomin Zuo,<sup>a\*</sup> Bin Dong,<sup>b</sup> Shi Gao,<sup>a</sup> Lijuan You,<sup>a</sup> Xuefeng Wang<sup>a\*</sup>

<sup>a</sup> Institute of NBC defense, P.O. Box 1048, Beijing, 102205, China

<sup>b</sup> State Key Laboratory of NBC Protection for Civilian, Beijing, 102205, China

\*Corresponding authors.

E-mail: [zuogomin\\_fh@yeah.net](mailto:zuogomin_fh@yeah.net), [uxwangxu@sohu.com](mailto:uxwangxu@sohu.com)

Fax: +86 010 52565376

### Synthesis and characterization of DPXT for sulfur mustard

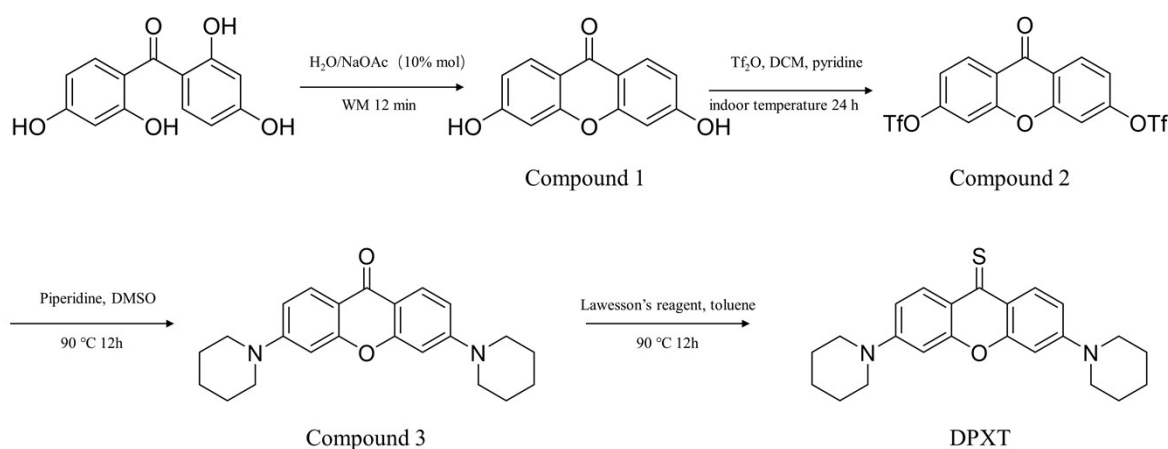

**Scheme S1** Synthetic Route for DPXT Probe.

### Synthesis 3,6-Dihydroxy-9H-xanthen-9-one (Compound 1)

In the presence of NaOAc as a base catalyst, the cyclization of hydroxybenzophenone 2,2,4,4-tetrahydroxybenzophenone to hydroxyxanthone Compound 1 under microwave irradiation at 100 °C in

water as solvent was accomplished in 12 min.<sup>1</sup> 2,2,4,4-tetrahydroxybenzophenone (2.46 g, 10.0 mmol) and NaOAc (0.082 g, 1 mmol, 10% mol) in water (40 mL) was introduced in the cavity of the microwave reactor and irradiated for 12 min in PTFE microwave digestion tank. After cooling to room temperature, the reaction mixture was collected by Büchner funnel and washed with water (3×30 mL), hexane (3×30 mL) and dried, Compound 1 was obtained as a white solid (2.166 g, 95%). <sup>1</sup>H NMR (400 MHz, DMSO-d<sub>6</sub>): δ 7.99 (d, J = 8.7 Hz, 2H), 10.82 (s, 2H), 6.87 (dd, J = 8.7, 2.2 Hz, 2H), 6.83 (d, J = 2.2 Hz, 2H). <sup>13</sup>C NMR (100 MHz, DMSO) δ 174.39, 163.83, 157.94, 128.24, 114.46, 114.13, 102.56.

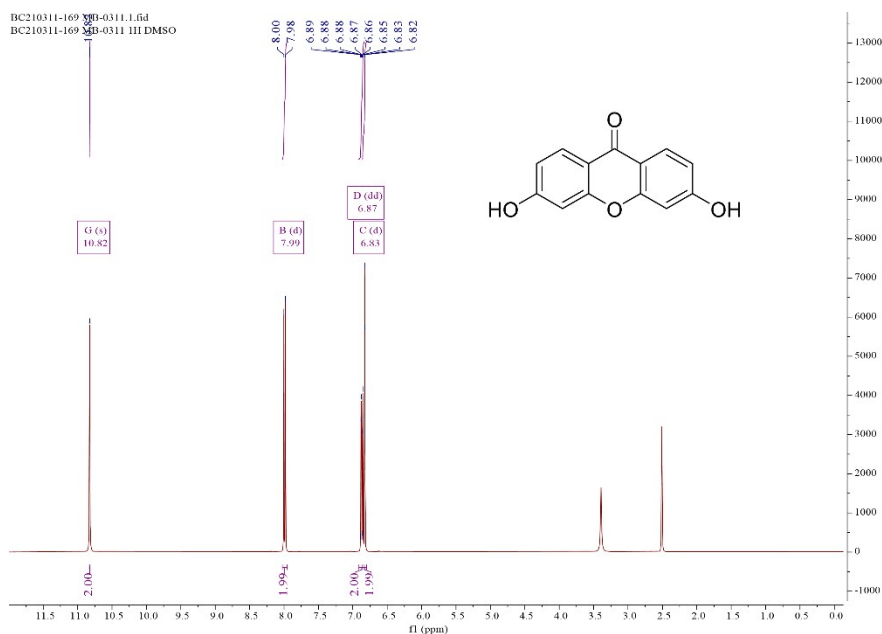

**Fig. S1** <sup>1</sup>H NMR spectrum of Compound 1 (DMSO-d<sub>6</sub>, 400 MHz).

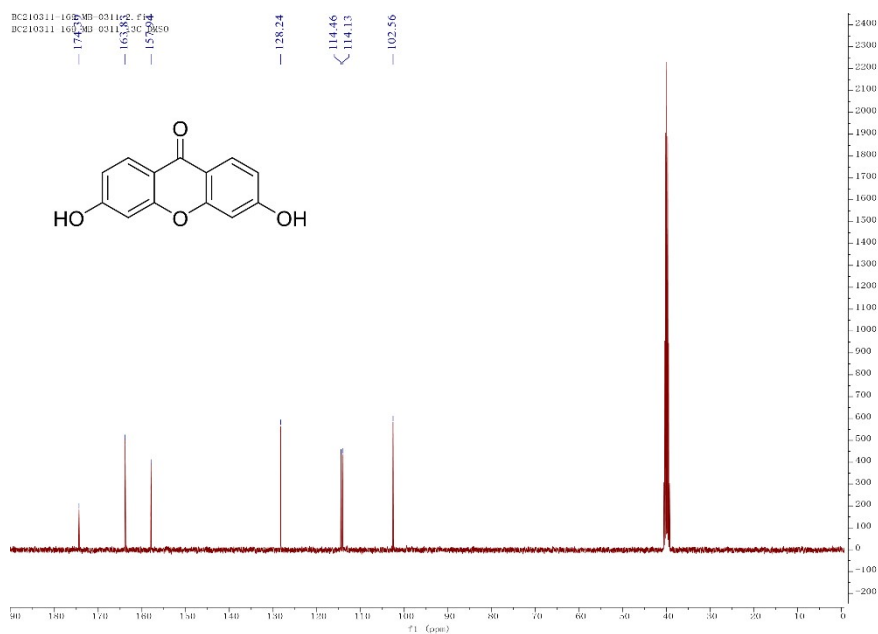

Fig. S2 <sup>13</sup>C NMR spectrum of Compound 1 (DMSO-d<sub>6</sub>, 100 MHz).

## Synthesis of 3,6-Di(piperidin-1-yl)-9H-xanthene-9-thione (DPXT)

After the compound 1 was obtained, DPXT was synthesized according to a reported method.<sup>2</sup> The <sup>1</sup>H NMR, <sup>13</sup>C NMR and ESI-MS spectrum were shown below.

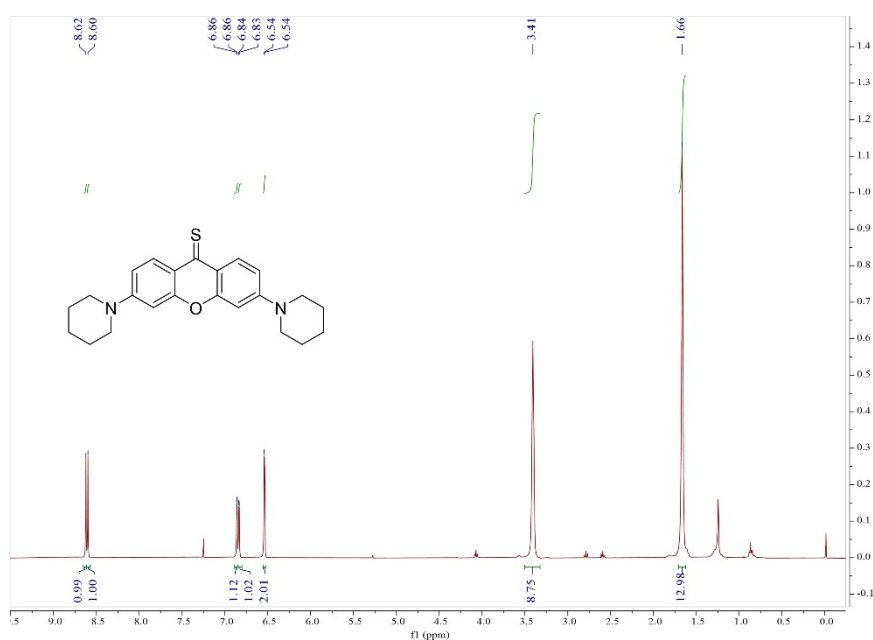

**Fig. S3**  $^1\text{H}$  NMR characterization results of DPXT ( $\text{CDCl}_3$ , 400 MHz).

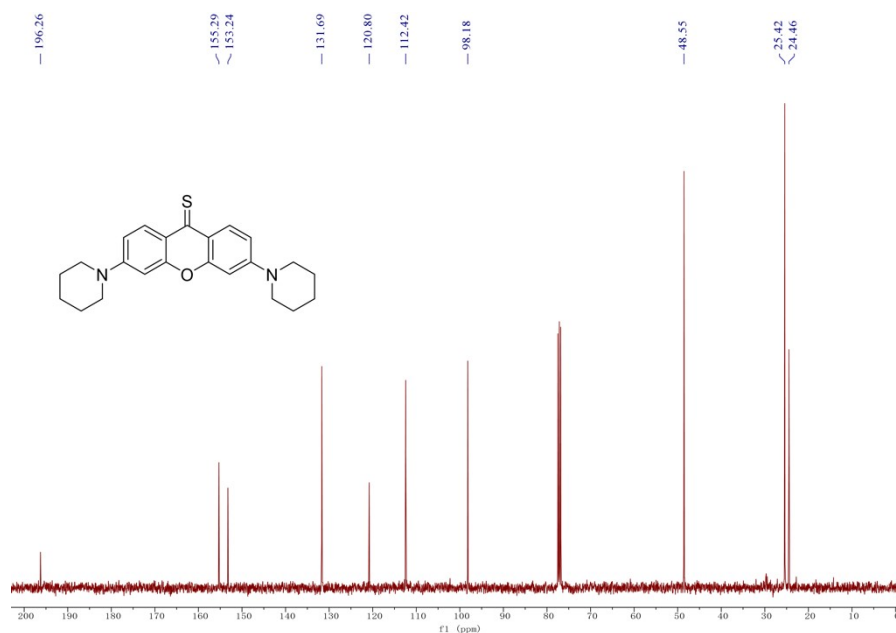

**Fig. S4**  $^{13}\text{C}$  NMR characterization results of DPXT ( $\text{CDCl}_3$ , 400 MHz).

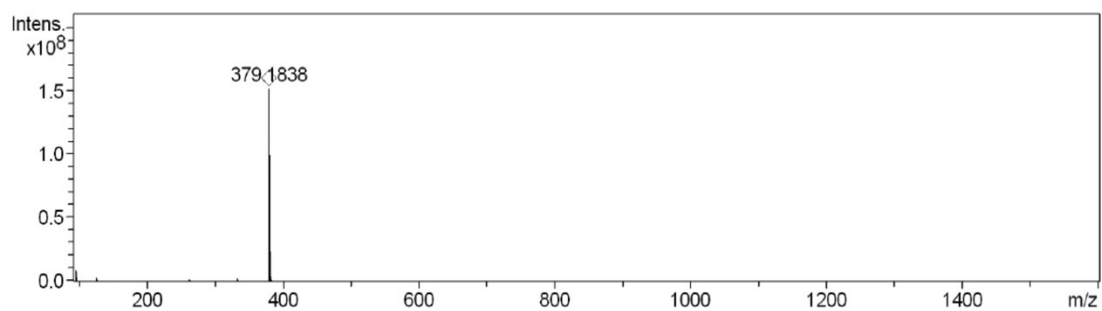

**Fig. S5** ESI-MS spectrum of DPXT.

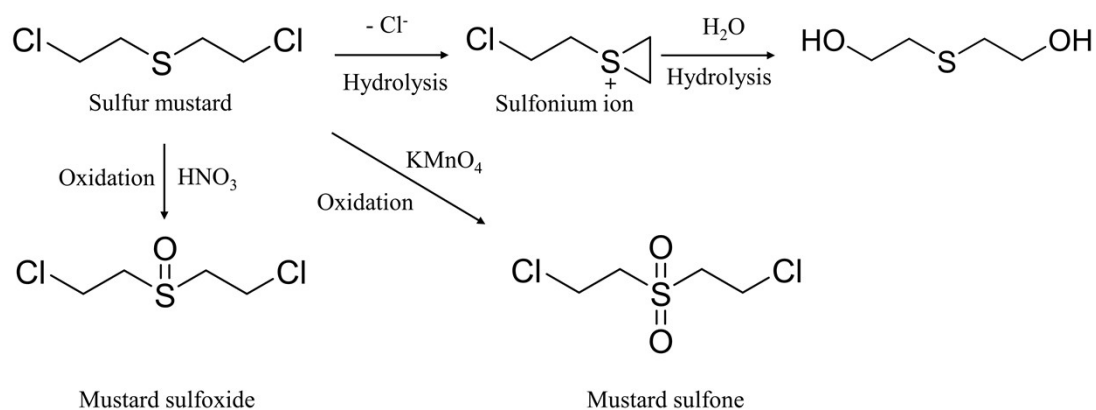

**Scheme S2** The primary hydrolysis and oxidation pathways of HD

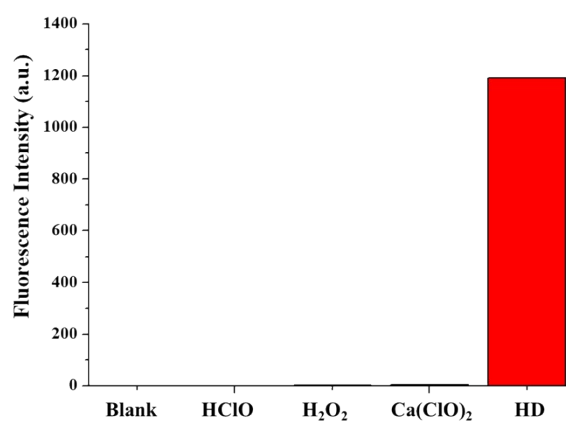

**Fig. S6** Fluorescence responses (615 nm) of DPXT (10  $\mu$ M) toward HD (1 mM) and common oxidizing substances (2 mM) in sodium bicarbonate buffer (pH=7.2, 30% ACN).

## DTF Calculations

Geometric optimizations and energy level calculations were performed in the gas phase at the B3LYP 6-31 G (d, p) level of theory, using the Gaussian 09 software package. Absolute energies in Hartrees are given without additional corrections.

**Table S1** Cartesian coordinates of DPXT in the ground state.

(Energy: -1475.0844 hartrees)

| Center<br>Number | Atom | Coordinates (ground state) |         |         |
|------------------|------|----------------------------|---------|---------|
|                  |      | X                          | Y       | Z       |
| 1                | C    | -3.6632                    | 1.4839  | 0.0058  |
| 2                | C    | -3.6056                    | 0.0632  | 0.0315  |
| 3                | C    | -2.3305                    | -0.5279 | 0.0430  |
| 4                | C    | -1.1853                    | 0.2602  | 0.0242  |
| 5                | C    | -1.2247                    | 1.6697  | -0.0098 |
| 6                | C    | -2.5125                    | 2.2443  | -0.0169 |
| 7                | O    | -0.0051                    | -0.4309 | 0.0239  |
| 8                | C    | 1.1766                     | 0.2543  | -0.0045 |
| 9                | C    | 1.2265                     | 1.6606  | -0.0199 |
| 10               | C    | 0.0039                     | 2.4545  | -0.0261 |
| 11               | C    | 2.3202                     | -0.5451 | 0.0046  |
| 12               | C    | 3.5943                     | 0.0396  | -0.0185 |
| 13               | C    | 3.6626                     | 1.4617  | -0.0411 |
| 14               | C    | 2.5214                     | 2.2293  | -0.0400 |
| 15               | S    | 0.0104                     | 4.1322  | -0.0502 |
| 16               | N    | -4.7568                    | -0.7242 | 0.0107  |
| 17               | N    | 4.7626                     | -0.7227 | -0.0681 |
| 18               | C    | -4.8150                    | -1.9416 | 0.8323  |
| 19               | C    | -5.7821                    | -2.9741 | 0.2478  |
| 20               | C    | -7.1758                    | -2.3655 | 0.0577  |
| 21               | C    | -7.0734                    | -1.0847 | -0.7768 |
| 22               | C    | -6.0638                    | -0.0940 | -0.1821 |
| 23               | C    | 5.9065                     | -0.3239 | 0.7669  |
| 24               | C    | 7.2284                     | -0.8407 | 0.1948  |
| 25               | C    | 7.1815                     | -2.3614 | 0.0097  |
| 26               | C    | 5.9608                     | -2.7456 | -0.8328 |
| 27               | C    | 4.6620                     | -2.1708 | -0.2527 |
| 28               | H    | -4.6175                    | 1.9932  | 0.0363  |
| 29               | H    | -2.1959                    | -1.6018 | 0.0245  |
| 30               | H    | -2.5718                    | 3.3273  | -0.0233 |
| 31               | H    | 2.1760                     | -1.6158 | 0.0574  |
| 32               | H    | 4.6254                     | 1.9547  | -0.1045 |
| 33               | H    | 2.5860                     | 3.3115  | -0.0732 |
| 34               | H    | -3.8177                    | -2.3703 | 0.9193  |
| 35               | H    | -5.1385                    | -1.6779 | 1.8558  |
| 36               | H    | -5.3933                    | -3.3206 | -0.7179 |
| 37               | H    | -5.8219                    | -3.8428 | 0.9151  |
| 38               | H    | -7.8519                    | -3.0833 | -0.4196 |
| 39               | H    | -7.6072                    | -2.1297 | 1.0408  |
| 40               | H    | -6.7562                    | -1.3363 | -1.7964 |

|    |   |         |         |         |
|----|---|---------|---------|---------|
| 41 | H | -8.0479 | -0.5891 | -0.8540 |
| 42 | H | -5.9497 | 0.7455  | -0.8697 |
| 43 | H | -6.4536 | 0.3088  | 0.7707  |
| 44 | H | 5.9318  | 0.7616  | 0.8530  |
| 45 | H | 5.7715  | -0.7214 | 1.7894  |
| 46 | H | 7.4136  | -0.3543 | -0.7711 |
| 47 | H | 8.0446  | -0.5532 | 0.8675  |
| 48 | H | 8.1024  | -2.7245 | -0.4597 |
| 49 | H | 7.1161  | -2.8461 | 0.9941  |
| 50 | H | 6.0855  | -2.3630 | -1.8534 |
| 51 | H | 5.8623  | -3.8348 | -0.9053 |
| 52 | H | 3.8430  | -2.3759 | -0.9454 |
| 53 | H | 4.4225  | -2.6768 | 0.7009  |

**Table S2** Cartesian coordinates of product for DPXT reaction with sulfur mustard in the ground state.

| Center<br>Number | Atom | Coordinates (ground state) |         |         |
|------------------|------|----------------------------|---------|---------|
|                  |      | X                          | Y       | Z       |
| 1                | C    | -2.3421                    | 3.1659  | -0.6812 |
| 2                | C    | -3.4902                    | 2.5401  | -0.1477 |
| 3                | C    | -3.4299                    | 1.1467  | 0.0593  |
| 4                | C    | -2.2840                    | 0.4341  | -0.2462 |
| 5                | C    | -1.1193                    | 1.0416  | -0.7875 |
| 6                | C    | -1.2041                    | 2.4363  | -0.9920 |
| 7                | O    | -2.3415                    | -0.9180 | -0.0041 |
| 8                | C    | -1.2630                    | -1.7191 | -0.2883 |
| 9                | C    | -0.0650                    | -1.1865 | -0.8229 |
| 10               | C    | 0.0248                     | 0.2237  | -1.0757 |
| 11               | C    | -1.4271                    | -3.0678 | 0.0043  |
| 12               | C    | -0.3896                    | -3.9839 | -0.2420 |
| 13               | C    | 0.8114                     | -3.4751 | -0.7928 |
| 14               | C    | 0.9638                     | -2.1296 | -1.0658 |
| 15               | N    | -4.6747                    | 3.2405  | 0.1381  |
| 16               | N    | -0.5288                    | -5.3621 | -0.0061 |
| 17               | C    | -5.3056                    | 3.0136  | 1.4475  |
| 18               | C    | -6.7850                    | 3.4060  | 1.4337  |
| 19               | C    | -6.9573                    | 4.8582  | 0.9745  |
| 20               | C    | -6.2569                    | 5.0663  | -0.3720 |
| 21               | C    | -4.7890                    | 4.6255  | -0.3183 |
| 22               | C    | 0.5438                     | -6.0349 | 0.7431  |
| 23               | C    | 0.5408                     | -7.5442 | 0.4900  |
| 24               | C    | -0.8301                    | -8.1468 | 0.8174  |
| 25               | C    | -1.9276                    | -7.3947 | 0.0567  |
| 26               | C    | -1.8577                    | -5.8839 | 0.3106  |

|    |    |         |         |         |
|----|----|---------|---------|---------|
| 27 | H  | -2.3254 | 4.2376  | -0.8355 |
| 28 | H  | -4.2851 | 0.5926  | 0.4274  |
| 29 | H  | -0.3371 | 2.9449  | -1.3988 |
| 30 | H  | -2.3684 | -3.3702 | 0.4445  |
| 31 | H  | 1.6160  | -4.1568 | -1.0454 |
| 32 | H  | 1.8856  | -1.7739 | -1.5131 |
| 33 | H  | -5.1979 | 1.9635  | 1.7203  |
| 34 | H  | -4.7794 | 3.6005  | 2.2239  |
| 35 | H  | -7.3247 | 2.7359  | 0.7529  |
| 36 | H  | -7.2036 | 3.2603  | 2.4363  |
| 37 | H  | -8.0190 | 5.1197  | 0.9020  |
| 38 | H  | -6.5163 | 5.5310  | 1.7237  |
| 39 | H  | -6.7693 | 4.4825  | -1.1466 |
| 40 | H  | -6.3003 | 6.1185  | -0.6763 |
| 41 | H  | -4.3549 | 4.6968  | -1.3184 |
| 42 | H  | -4.2218 | 5.3140  | 0.3370  |
| 43 | H  | 1.5045  | -5.6060 | 0.4568  |
| 44 | H  | 0.4203  | -5.8453 | 1.8261  |
| 45 | H  | 0.7850  | -7.7286 | -0.5637 |
| 46 | H  | 1.3272  | -8.0109 | 1.0946  |
| 47 | H  | -0.8539 | -9.2146 | 0.5728  |
| 48 | H  | -1.0133 | -8.0660 | 1.8983  |
| 49 | H  | -1.8159 | -7.5731 | -1.0199 |
| 50 | H  | -2.9211 | -7.7577 | 0.3447  |
| 51 | H  | -2.5881 | -5.3769 | -0.3249 |
| 52 | H  | -2.1335 | -5.6727 | 1.3617  |
| 53 | C  | 2.5415  | 1.1187  | -0.2055 |
| 54 | H  | 2.0331  | 1.8039  | 0.4771  |
| 55 | H  | 2.6231  | 0.1399  | 0.2736  |
| 56 | C  | 6.4973  | 2.4529  | 0.1297  |
| 57 | H  | 6.8569  | 1.7191  | -0.5970 |
| 58 | H  | 6.2893  | 3.3910  | -0.3923 |
| 59 | S  | 1.5089  | 0.9366  | -1.7421 |
| 60 | C  | 3.9166  | 1.6526  | -0.5935 |
| 61 | H  | 3.8275  | 2.6291  | -1.0797 |
| 62 | H  | 4.4136  | 0.9648  | -1.2847 |
| 63 | S  | 4.9528  | 1.8311  | 0.9182  |
| 64 | C  | 7.5416  | 2.6749  | 1.2119  |
| 65 | H  | 7.7876  | 1.7490  | 1.7329  |
| 66 | H  | 7.2206  | 3.4236  | 1.9369  |
| 67 | Cl | 9.0918  | 3.2883  | 0.4859  |

---



Based on DFT, the excitation energy and oscillator strength (f) of the probe molecule in dichloromethane solvent and the measured values of fluorescence probe molecule in dichloromethane solvent are shown in Table S3 and Fig. S7 . It can be seen from Fig. S7 that the calculated maximum absorption peak is basically consistent with the experimental value. The calculated electron transition orbits 101  $\rightarrow$  102 corresponding to  $\lambda_{\text{max}} = 449$  nm are molecular Homo orbital and LUMO orbital. The absorption at 378 nm is the transition from HOMO-1 and HOMO-3 to LUMO.

**Table S3** Calculated optical transitions for probe

| Absorption<br>observed in<br>experiment | Calculated excitation<br>energy (eV) | Transition orbit      | Oscillator<br>strength (f) |
|-----------------------------------------|--------------------------------------|-----------------------|----------------------------|
| 449 nm                                  | 2.8405 eV (436.48 nm)                | 99 $\rightarrow$ 102  | 0.0018                     |
|                                         | 2.9728 eV (417.06 nm)                | 101 $\rightarrow$ 102 | 0.7936                     |
| 378 nm                                  | 3.3256 eV (372.82 nm)                | 98 $\rightarrow$ 102  | 0.2418                     |
|                                         |                                      | 100 $\rightarrow$ 102 |                            |

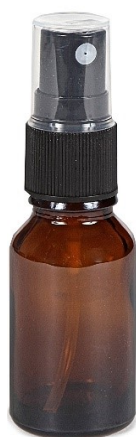

**Fig. S7** The commercially available pump to spray fluorescent material.

## Reference

1. X. J. Zhang and Q. D. You, *Cheminform*, 2012, **42**, 2952-2958.
2. H. Wang, J. Guan, X. Han, S.-W. Chen, T. Li, Y. Zhang, M.-S. Yuan and J. Wang, *Talanta*, 2018, **189**, 39-44.
